# Supplementary material for: Reticular-vein-like Cu@Cu2O/reduced graphene oxide nanocomposites for a non-enzymatic glucose sensor
Source: Royal Society of Chemistry journal article supplement (doi:10.1039/c4ra02390k), 2014-01-01
Supplement: c4ra02390k1.pdf [file c4ra02390k1.pdf]

## Supporting Information

### Reticular-vein-like Cu@Cu<sub>2</sub>O/reduced graphene oxide nanocomposites for non-enzymatic glucose sensor

Huanhuan Huo, Chunyan Guo, Guilin Li, Xu Han, Cailing Xu\*

State Key Laboratory of Applied Organic Chemistry, Key Laboratory of Nonferrous Metal Chemistry  
and Resources Utilization of Gansu Province, College of Chemistry and Chemical Engineering,

Lanzhou University, Lanzhou, 730000, China

\*Corresponding author:

Cailing Xu: Tel: +86-931-891-2589, FAX: +86-931-891-2582, Email: xucl@lzu.edu.cn

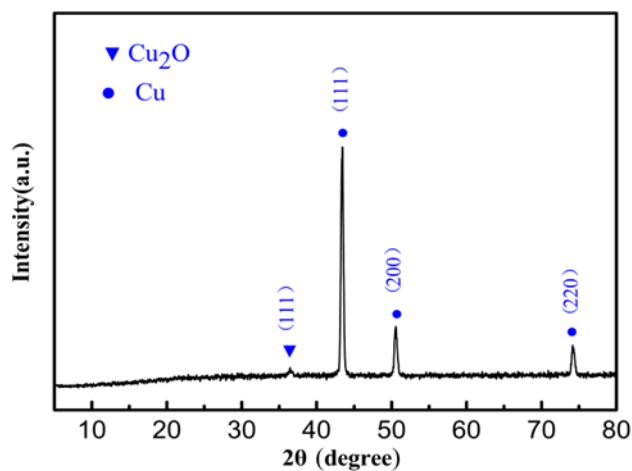

Fig. S1 XRD pattern of Cu.

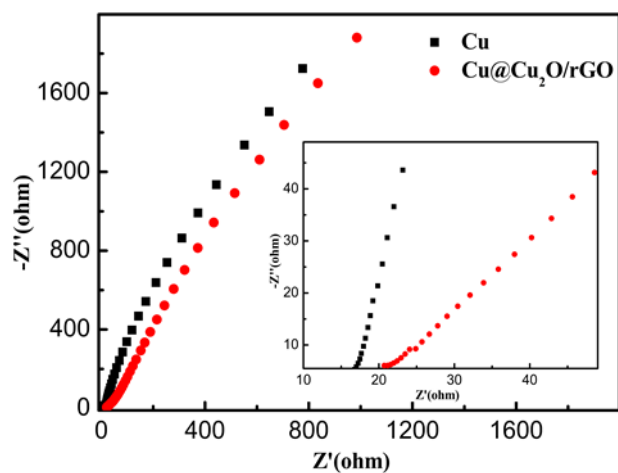

Fig. S2 Electrochemical impedance spectroscopy (EIS) of Cu@Cu<sub>2</sub>O/rGO electrode and Cu electrode in the frequency range 0.01 to 100 kHz. An enlargement at the high frequency region is shown in the inset.

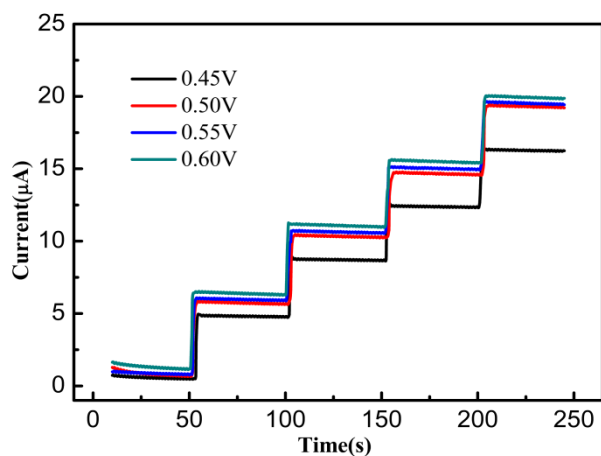

Fig. S3 Amperometric response of Cu@Cu<sub>2</sub>O/rGO electrode at different potentials from 0.45 V to 0.60 V with successive additions of 0.5 mM glucose.

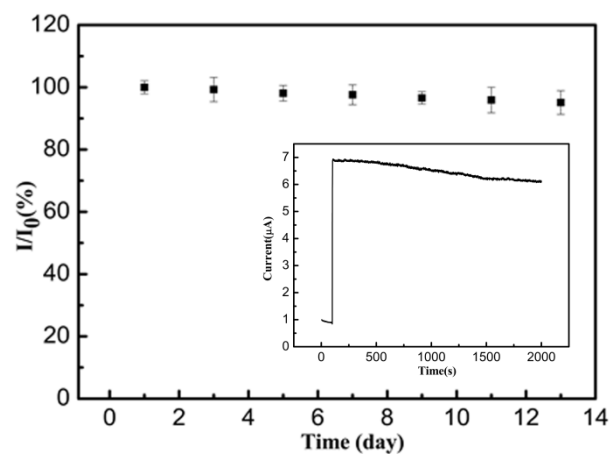

Fig.S4 Long-term stability of the Cu@Cu<sub>2</sub>O/rGO modified electrode stored at ambient conditions and tested every two days over two weeks in 0.5 M NaOH with addition of 1.0 mM glucose at 0.5 V. The RSD is calculated from three repeated measurements. Inset shows the amperometric response towards 1.0 mM glucose over a period of 2000 s.
